# Supplementary material for: Structure and dynamics of polyrotaxane-based sliding graft copolymers with alkyl side chains
Source: Royal Society of Chemistry journal article supplement (doi:10.1039/c2sm27047a), 2012-12-19
Supplement: c2sm27047a.pdf [file c2sm27047a.pdf]

## **Electronic Supplementary Information**

# **Structure and Dynamics of Polyrotaxane-based Sliding Graft Copolymers with Alkyl Side Chains**

**Yasuhiro Sakai\*, Ryojiro Gomi, Kazuaki Kato, Hideaki Yokoyama and Kohzo Ito\***

*Department of Advanced Materials Science, Graduate School of Frontier Sciences,  
The University of Tokyo, 5-1-5 Kashiwanoha, Kashiwa, Chiba 277-8561, Japan*

*\* E-mail: sakai@molle.k.u-tokyo.ac.jp (Y. Sakai), kohzo@molle.k.u-tokyo.ac.jp (K. Ito)*

### Estimation of Grafting Density

The side chain grafting density,  $N$  (*i.e.*, average number of side chains per CD molecule), was estimated from  $^1\text{H}$  NMR spectra (Figure S1).  $^1\text{H}$  NMR (400 MHz,  $\text{CDCl}_3$ ,  $\delta$ ): 0.7–1.3 (methyl and methylene of alkyl side chains), 1.7 ( $\beta$ -methylene of carbonyl), 2.0 ( $\beta$ -methylene of C=C), 2.3 ( $\alpha$ -methylene of carbonyl), 3.5–5.0 (H of CD and PEG), 5.3–5.4 (H of vinylene in C18:1-g-PR side chain), 7.26 ( $\text{CHCl}_3$ ). The SGCs did not dissolve well in  $\text{CHCl}_3$  and other organic solvents; hence, the  $^1\text{H}$  NMR spectra showed broad peaks. For the same reason, valid data for gel permeation chromatography (GPC) were not obtained for several SGCs. The GPC charts for C8-g-PR and C18-g-PR are shown in Figure S2. Values determined for  $N$  and molecular weights are summarized in Table S1.

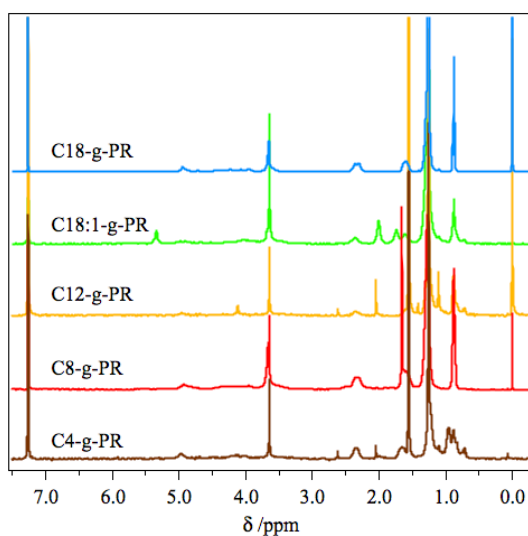

Figure S1:  $^1\text{H}$  NMR spectra of SGCs.

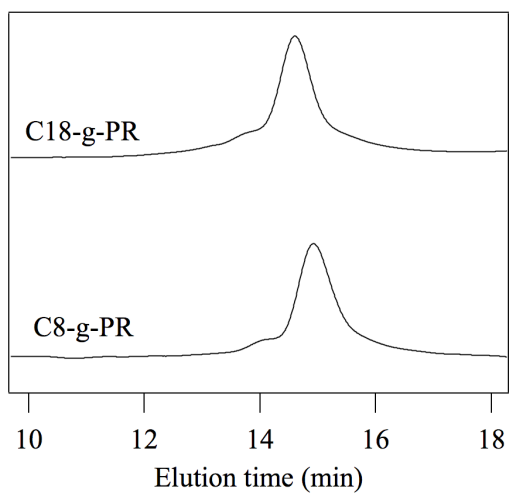

Figure S2: GPC charts of C8-g-PR and C18-g-PR.

Table S1: Average number of side chains per CD molecule,  $N$ , and molecular weight.

| sample     | $N$  | $M_w$   | $M_w/M_n$ |
|------------|------|---------|-----------|
| C4-g-PR    | 14.5 | –       | –         |
| C8-g-PR    | 13.2 | 116,000 | 1.7       |
| C12-g-PR   | 9.6  | –       | –         |
| C18:1-g-PR | 6.2  | –       | –         |
| C18-g-PR   | 8.2  | 164,000 | 1.3       |

### Viscoelastic spectra of C18-g-PR measured above the melting point

Figure S3 shows the master curve of storage ( $G'$ ) and loss ( $G''$ ) modulus of C18-g-PR measured above the melting point (60–110°C). The measurement was conducted using Rheosol-G5000 (UBM, Kyoto, Japan) in cone and plate geometry at amplitude of 1°. The behavior was almost the same as typical melt polymers;  $G'$  and  $G''$  were proportional to  $\omega^2$  and  $\omega$ , respectively. Clear relaxation behavior was not observed in the spectra.

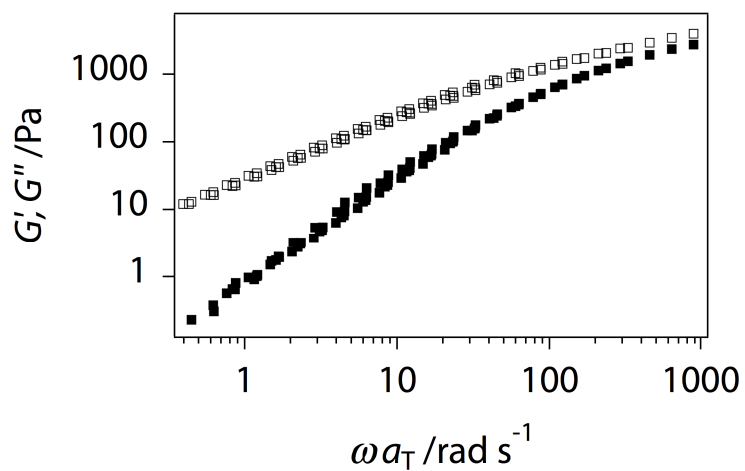

Figure S3: Master curve of storage and loss modulus of C18-g-PR.

## Spectra of $\tan \delta$

The spectra of  $\tan \delta$  corresponding to Figure 9 are shown in Figure S4.

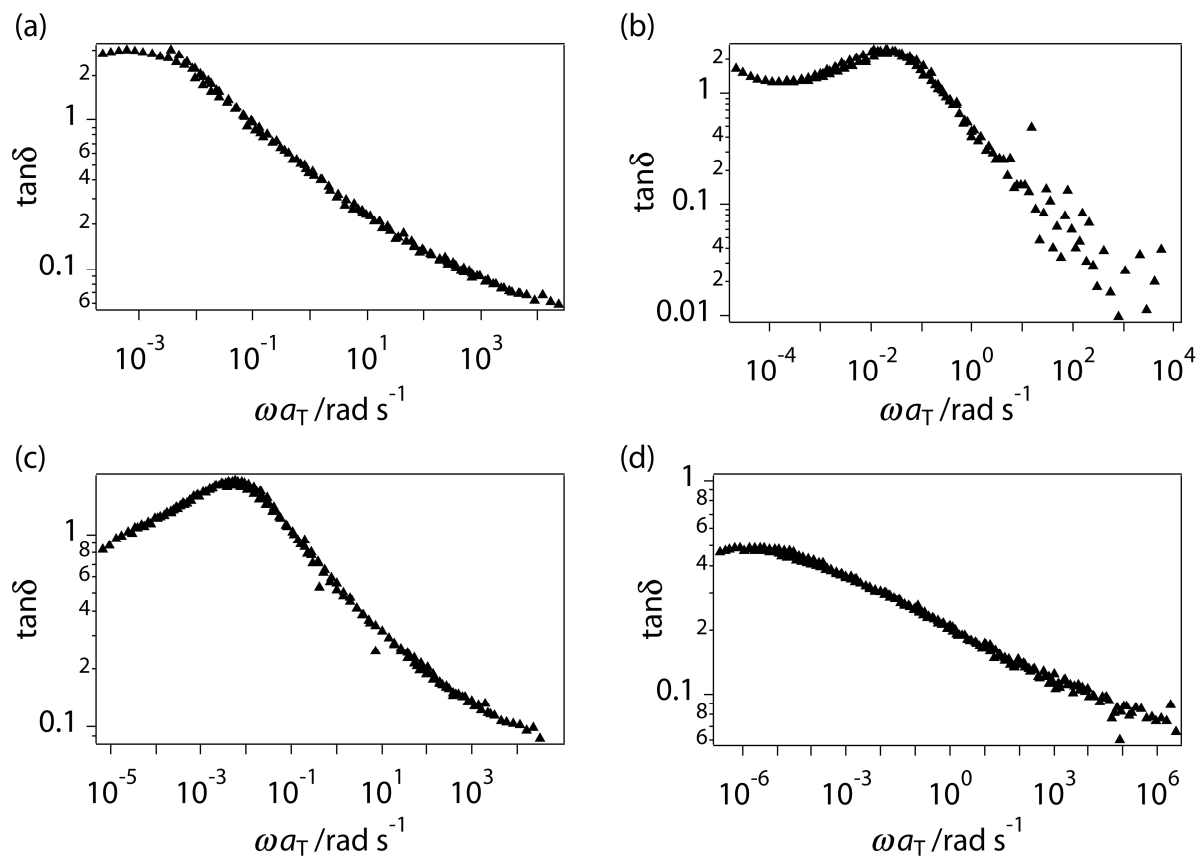

Figure S4: Master curves of  $\tan \delta$  corresponding to Figure 9. (a) C4-g-PR ( $T_0 = 50^\circ\text{C}$ ), (b) C8-g-PR ( $T_0 = 10^\circ\text{C}$ ), (c) C12-g-PR ( $T_0 = 50^\circ\text{C}$ ), and (d) C18:1-g-PR ( $T_0 = 60^\circ\text{C}$ ).
